# Supplementary material for: Thin film synthesis of the organic-based magnet vanadium ethyl tricyanoethylenecarboxylate
Source: Royal Society of Chemistry journal article supplement (doi:10.1039/c5ra16699c), 2015-01-01
Supplement: c5ra16699c1.pdf [file c5ra16699c1.pdf]

## Thin film synthesis of the organic-based magnet vanadium ethyl tricyanoethylenecarboxylate

Yu Lu<sup>1</sup>, Howard Yu<sup>2</sup>, Megan Harberts<sup>2</sup>, Arthur J. Epstein<sup>1,2\*</sup>, and Ezekiel Johnston-Halperin<sup>2\*</sup>

<sup>1</sup>Department of Chemistry, The Ohio State University, Columbus, Ohio, 43210, United States.

<sup>2</sup>Department of Physics, The Ohio State University, Columbus, Ohio, 43210, United States.

Email: ejh@physics.osu.edu; epstein@physics.osu.edu

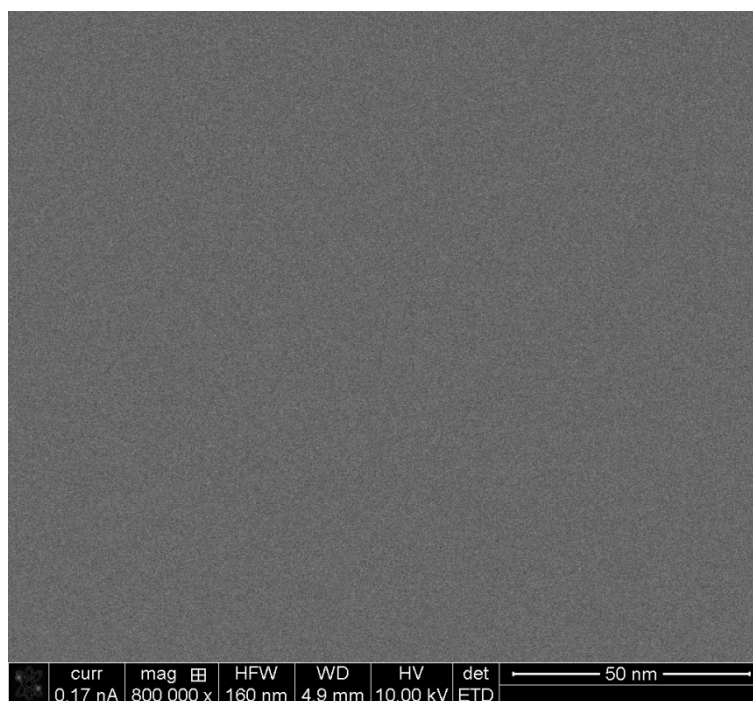

Figure S1 SEM photo of surface morphology of CVD deposited V(ETCEC)<sub>x</sub> film

The surface morphology of CVD deposited V(ETCEC)<sub>x</sub> film investigated by scanning electron microscopy (SEM, FEI Helios Nanolab 600 Dual Beam Focused Ion Beam/Scanning Electron Microscope) shows absence of polycrystalline granular structure and instead displays homogeneous surface (Figure S1). The thin film was prepared on top of Si substrate with a thickness of ~200 nm.

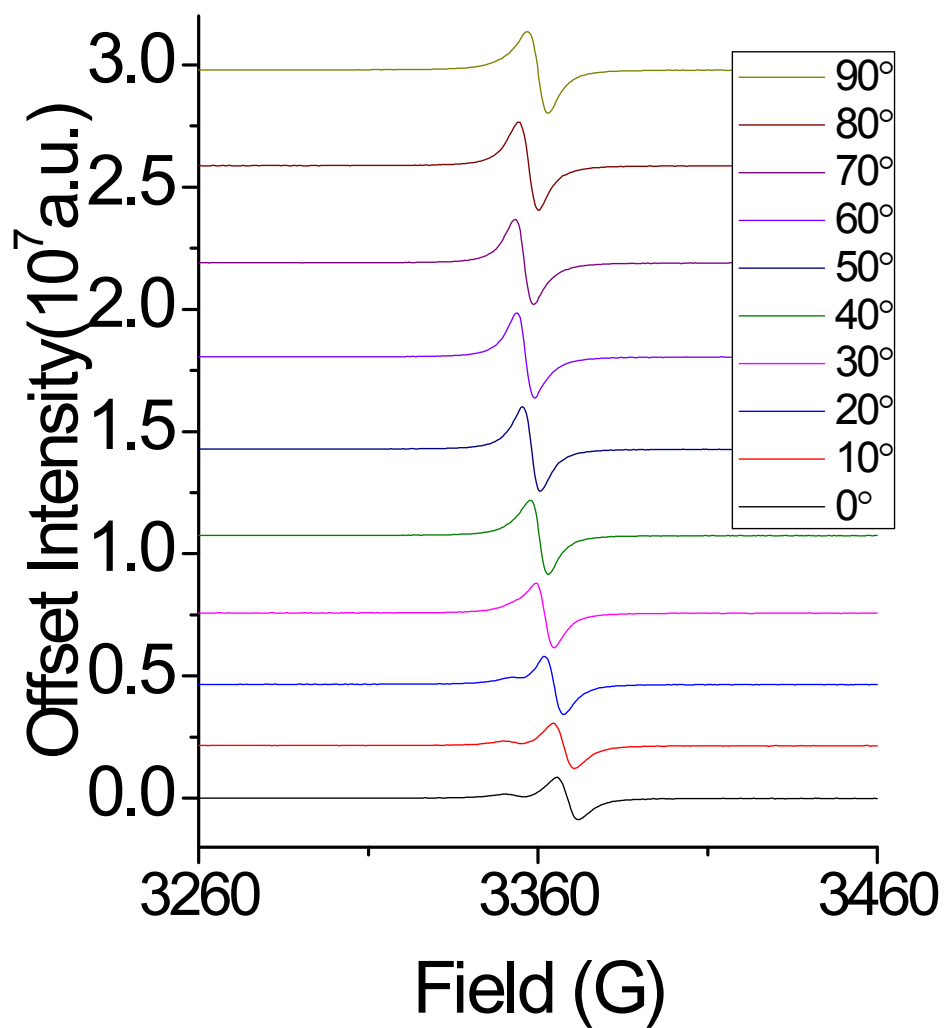

Figure S2 FMR spectrum measured in an EPR spectrometer of a 200 nm V[ETCEC]<sub>x</sub> film at 5 K as a function of angle from in-plane(90° ) to out-of-plane(0° ).

The FMR response at this temperature does not appear to change significantly when the applied field rotates (Figure S2), which is consistent with SQUID data that indicates a low saturation magnetization.
